# Supplementary material for: Effects of the impact angle on the coefficient of restitution in rockfall analysis based on a medium-scale laboratory test
Source: Copernicus journal article supplement (doi:10.5194/nhess-18-3045-2018), 2018-11-19
Supplement: Supplementary file 1 [file data set of nhess-2018-108.xlsx]

## Sheet: Sheet1
D: the diameter of samples (cm)
θ: the inclined angle of the landing plate (o)
H: the release height (m)
vni: the normal impact velocity (m.s-1)
vti: the tagential impact velocity (m.s-1)
vi: the impact velocity (m.s-1)
α: the impact angle (o)
vnr: the normal rebound velocity (m.s-1)
vtr: the tagential rebound velocity (m.s-1)
Rn: the normal coefficient of restitution
Rt: the tangential coefficient of restitution
vr: the rebound velocity (m.s-1)
Rv: the kinematic coefficient of restitution
ωr: Rotational velocities (rad.s-1)
RE: the kinetic energy coefficient of restitution
β: the rebound angles (o)
D	θ	H	vni	vti	vi	α	vnr	vtr	Rn	Rt	vr	Rv	ωr	RE	β
10	30	2.5	5.366	3.65	6.48972	55.7761	2.57	2.898	0.478941	0.793973	3.87341	0.596853	48.4	0.411855	41.5685
			5.753	3.394	6.67954	59.4614	1.714	2.824	0.297932	0.832057	3.30345	0.494562	43.2	0.286421	31.2563
			5.299	3.535	6.3699	56.2925	1.929	2.902	0.364031	0.820934	3.48463	0.547046	41.5	0.341705	33.6136
			5.445	3.476	6.45992	57.4465	2.826	2.655	0.519008	0.763809	3.87754	0.600245	49.2	0.418301	46.7885
		3.5	6.553	4.101	7.73046	57.9608	2.536	3.342	0.386998	0.814923	4.19527	0.542693	50.6	0.33736	37.1934
			6.314	4.39	7.69017	55.1899	2.683	4.008	0.424929	0.912984	4.82313	0.627181	55.4	0.445254	33.7999
			6.68	4.099	7.83736	58.4658	2.184	4.168	0.326946	1.01683	4.70554	0.600398	44.8	0.393153	27.6551
		4.5	7.751	4.506	8.9656	59.8287	3.039	3.947	0.392078	0.875943	4.9814	0.555612	51.3	0.341445	37.5957
			7.457	4.921	8.93438	56.5785	3.177	4.074	0.426043	0.827881	5.16631	0.578251	65.8	0.388615	37.9491
			7.901	4.863	9.27764	58.388	2.718	4.537	0.344007	0.932963	5.28885	0.570064	59.2	0.365689	30.9257
	45	2.5	3.992	4.708	6.17263	40.2952	2.141	3.879	0.536323	0.823917	4.43063	0.717787	42.6	0.562849	28.8973
			4.234	5.129	6.65082	39.5397	2.562	3.852	0.605102	0.751024	4.6262	0.695584	53.7	0.549029	33.6293
			4.124	4.831	6.35185	40.4858	2.04	4.628	0.494665	0.95798	5.05767	0.796251	39.8	0.673278	23.7884
			3.914	5.128	6.45103	37.3531	1.952	3.739	0.498723	0.729134	4.21787	0.653829	46.4	0.479227	27.5684
		3.5	4.95	5.91	7.70912	39.9483	2.723	4.468	0.550101	0.756007	5.23238	0.678725	58	0.517271	31.361
			4.788	5.928	7.62011	38.9275	2.406	5.258	0.502506	0.886977	5.78234	0.758825	53.2	0.624558	24.5891
			4.862	6.147	7.83739	38.3424	2.403	4.248	0.494241	0.691069	4.88056	0.622728	51.6	0.431138	29.4968
		4.5	5.592	6.66	8.69632	40.0182	2.696	4.682	0.482117	0.703003	5.40273	0.621266	67.6	0.446398	29.9352
			5.698	6.843	8.90471	39.7833	3.722	4.509	0.653212	0.658922	5.84674	0.65659	58.2	0.473827	39.5396
			5.523	6.694	8.67832	39.5249	3.342	5.349	0.605106	0.799074	6.3072	0.726777	54.1	0.567067	31.9977
	60	2.5	2.52	5.786	6.31096	23.5348	2.074	3.755	0.823016	0.64898	4.2897	0.679722	66.8	0.574059	28.9141
			2.868	5.757	6.43183	26.4814	2.23	4.22	0.777545	0.733021	4.77298	0.742086	59.4	0.635983	27.8545
			2.892	6.154	6.79966	25.1706	1.951	4.234	0.67462	0.688008	4.66188	0.685605	61.7	0.552392	24.7407
		3.5	3.382	7.386	8.12348	24.6027	2.797	6.323	0.827025	0.856079	6.91401	0.851114	62.4	0.7834	23.8631
			3.464	7.152	7.94672	25.8428	2.713	4.828	0.783199	0.675056	5.53805	0.696897	81.3	0.590331	29.3339
			3.494	6.91	7.74313	26.8232	3.613	3.849	1.03406	0.557019	5.27907	0.681774	75.4	0.559638	43.1899
		4.5	4.384	7.832	8.9755	29.2381	2.016	5.663	0.459854	0.723059	6.01114	0.669727	64.3	0.499857	19.5961
			3.81	7.997	8.85822	25.4745	2.913	5.374	0.764567	0.672002	6.11273	0.690063	81.5	0.560835	28.461
			3.798	7.694	8.58035	26.2724	1.414	5.394	0.372301	0.701066	5.57626	0.649887	66.2	0.481879	14.6896
	75	2.5	1.371	6.554	6.69586	11.8151	1.582	3.192	1.1539	0.487031	3.56253	0.532049	75.9	0.411566	26.3645
			1.652	6.086	6.30623	15.1866	1.553	3.378	0.940073	0.555044	3.71789	0.589558	68.2	0.464537	24.6909
			1.264	6.293	6.41869	11.3572	1.158	3.367	0.916139	0.535039	3.56057	0.554719	73.1	0.437414	18.98
		3.5	1.431	7.675	7.80726	10.5615	1.641	4.421	1.14675	0.576026	4.71573	0.604018	91.2	0.501294	20.3647
			1.464	7.83	7.96569	10.5905	1.11	7.117	0.758197	0.90894	7.20304	0.904258	53.5	0.862792	8.86498
			1.25	7.873	7.97161	9.02158	1.786	3.551	1.4288	0.451035	3.97485	0.498625	85.6	0.363934	26.7013
		4.5	1.301	8.758	8.8541	8.44949	1.663	5.281	1.27825	0.602992	5.53665	0.625321	97.5	0.512286	17.4799
			1.535	9.213	9.34	9.4593	3.054	3.924	1.98958	0.42592	4.97239	0.532376	107.2	0.415158	37.8944
			1.807	8.979	9.15902	11.3786	3.176	4.01352	1.75761	0.446989	5.11813	0.558808	93.2	0.415812	38.3567
D	θ	H	vni	vti	vi	α	vnr	vtr	Rn	Rt	vr	Rv	ωr	RE	β
20	30	2.5	5.365	3.26	6.2778	58.7154	2.119	2.728	0.394967	0.83681	3.45429	0.550239	20.6	0.345834	37.8398
			5.658	3.68	6.74947	56.9598	2.337	3.326	0.413043	0.903804	4.06495	0.602262	19.7	0.396796	35.0948
			5.37	3.436	6.37519	57.3868	2.073	3.03	0.386034	0.881839	3.67127	0.575869	24.8	0.392156	34.3794
		3.5	6.557	4.121	7.74447	57.8511	2.289	3.281	0.349093	0.796166	4.00056	0.51657	29.2	0.323709	34.9028
			6.888	3.983	7.95668	59.9613	1.908	4.134	0.277003	1.03791	4.55307	0.572232	23	0.360873	24.7759
			6.413	4.249	7.69289	56.4731	1.911	3.51	0.297988	0.826077	3.9965	0.519506	27.9	0.322499	28.5667
		4.5	7.358	5.102	8.9538	55.2628	2.833	4.664	0.385023	0.914151	5.45699	0.609461	30.4	0.417553	31.2763
			7.55	4.603	8.84252	58.6306	3.058	3.853	0.405033	0.837063	4.91904	0.556294	31.6	0.360547	38.4391
			7.431	4.372	8.62173	59.5297	2.356	3.725	0.31705	0.852013	4.40753	0.511213	25.8	0.297157	32.3137
			7.818	4.761	9.15359	58.6595	2.869	3.728	0.366974	0.783029	4.70416	0.513914	26.3	0.297129	37.5824
	45	2.5	4.609	4.788	6.64589	43.9087	2.769	3.596	0.600781	0.751044	4.53857	0.682913	33.8	0.569834	37.5983
			4.162	4.561	6.17454	42.3811	2.334	3.156	0.560788	0.691954	3.92529	0.635721	27.4	0.48291	36.4857
			3.922	5.279	6.57647	36.6103	2.028	3.88	0.517083	0.734988	4.37803	0.665712	32.1	0.538471	27.5961
		3.5	5.078	6.153	7.97781	39.5325	2.883	4.313	0.567743	0.700959	5.18784	0.650283	37.6	0.51172	33.7616
			5.375	5.938	8.0094	42.151	2.365	3.879	0.44	0.65325	4.54311	0.567223	28.7	0.373101	31.3714
			4.91	6.178	7.8915	38.4761	2.295	4.609	0.467413	0.746034	5.14878	0.652446	31.5	0.489418	26.4713
		4.5	5.717	6.736	8.83503	40.322	2.337	5.436	0.408781	0.807007	5.91707	0.669728	29.4	0.492829	23.2642
			5.484	6.572	8.55952	39.8433	3.239	5.645	0.590627	0.858947	6.50824	0.76035	29.7	0.626291	29.8474
			5.717	6.736	8.83503	40.322	2.337	6.109	0.408781	0.906918	6.54075	0.74032	22.7	0.57448	20.935
	60	2.5	2.524	5.736	6.26676	23.7508	2.097	4.176	0.830824	0.728033	4.67294	0.745671	39.4	0.714138	26.6646
			3.13	5.505	6.33261	29.6214	2.517	4.035	0.804153	0.73297	4.75568	0.750983	32.6	0.669982	31.9566
			2.888	5.691	6.38185	26.9063	1.9	3.927	0.657895	0.690037	4.36249	0.683578	31.5	0.56473	25.8199
		3.5	3.093	6.779	7.45127	24.5254	1.909	5.111	0.6172	0.753946	5.45588	0.732207	31.7	0.608524	20.4817
			3.294	6.925	7.66851	25.4389	2.208	4.1	0.67031	0.592058	4.65674	0.607255	38.4	0.469059	28.305
			3.194	6.881	7.58616	24.8996	2.958	4.362	0.926111	0.633919	5.27037	0.694735	42.5	0.6082	34.1434
		4.5	3.804	8.005	8.86287	25.4172	2.767	3.963	0.727392	0.495066	4.83339	0.545353	40.2	0.379703	34.9242
			4.141	7.896	8.91598	27.6744	1.944	5.291	0.469452	0.670086	5.63683	0.632216	31.3	0.448993	20.1748
			4.149	7.414	8.49598	29.2321	3.036	5.309	0.731743	0.716078	6.11578	0.719844	45.3	0.631894	29.7644
	75	2.5	1.417	5.889	6.05708	13.5292	1.239	3.645	0.874382	0.618951	3.84982	0.635591	40.5	0.582807	18.7744
			1.138	6.189	6.29275	10.4189	0.893	4.109	0.78471	0.66392	4.20492	0.668216	37.6	0.589321	12.2617
			1.047	5.809	5.9026	10.2172	0.743	4.885	0.709647	0.840936	4.94118	0.837119	25.2	0.773677	8.64858
		3.5	1.253	6.841	6.9548	10.3793	1.423	5.65	1.13567	0.825903	5.82644	0.837758	32.8	0.790807	14.1369
			1.816	7.054	7.28401	14.4369	1.439	4.719	0.792401	0.668982	4.93353	0.677309	31.6	0.53403	16.959
			1.313	7.547	7.66036	9.86933	1.709	4.014	1.3016	0.531867	4.36267	0.569512	42	0.444587	23.0631
		4.5	1.951	7.985	8.21989	13.7302	1.993	4.991	1.02153	0.625047	5.37421	0.653805	43.9	0.541554	21.7684
			1.505	7.458	7.60834	11.4089	1.617	6.1	1.07442	0.817914	6.31068	0.829443	35.6	0.775551	14.8471
			0.95	8.016	8.0721	6.75877	1.357	4.224	1.42842	0.526946	4.43662	0.549625	45	0.426399	17.8107
