# Supplementary material for: Effects of the impact angle on the coefficient of restitution in rockfall analysis based on a medium-scale laboratory test
Source: Copernicus journal article supplement (doi:10.5194/nhess-18-3045-2018), 2018-11-19
Supplement: Supplementary file [file nhess-18-3045-2018-supplement-title-page.pdf › nhess-18-3045-2018-supplement-title-page.pdf]

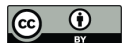

## *Supplement of*

# **Effects of the impact angle on the coefficient of restitution in rockfall analysis based on a medium-scale laboratory test**

**Yanhai Wang et al.**

*Correspondence to:* Wei Jiang ([jiangweilion@163.com](mailto:jiangweilion@163.com))

- [nhess-18-3045-2018-supplement-title-page.pdf](#)
- [data set of nhess-2018-108.xlsx](#)

The copyright of individual parts of the supplement might differ from the CC BY 4.0 License.
